# Supplementary material
Source: Springer Nature journal article supplement (https://www.springermedizin.de/resource/supplementary/13054_2009_8443_MOESM1_ESM.pdf/9731978)
Supplement: MOESM1 [file 9731978]

3966 Patients Screened

**3522 Excluded**  
Exclusion Criteria

1. under 16 years of age
2. without an indwelling urinary catheter
3. had obvious hematuria, rhabdomyolysis and/or myoglobinuria, or polycythemia (Hb>165 g/l or Hct >48 in women and Hb>185 g/l or Hct >52 in men)
4. receiving cytotoxic chemotherapy or renal replacement therapy (RRT), or assessed to need RRT within 48 hours
5. expected to leave ICU within 24 hours
6. not expected to survive 72 hours
7. had already experienced a greater than three-fold rise in plasma creatinine from a known baseline or had a urine output less than 0.3ml/kg/h for >6hrs (anuric)
8. no consent
9. received study drug

**Included**

444 Enrolled

268  
Not AKI & Not Sepsis

125 AKI

81 Sepsis

32 Died

236 Survived

95 AKI only

30 AKI & Sepsis

51 Sepsis only

20 Died

75 Survived

4 Died

26 Survived

8 Died

43 Survived
